# Supplementary material
Source: Copernicus journal article supplement (doi:10.5194/essd-2026-183)
Supplement: Supplementary file 1 [file essd-2026-183-supplement.pdf]

Supplementary

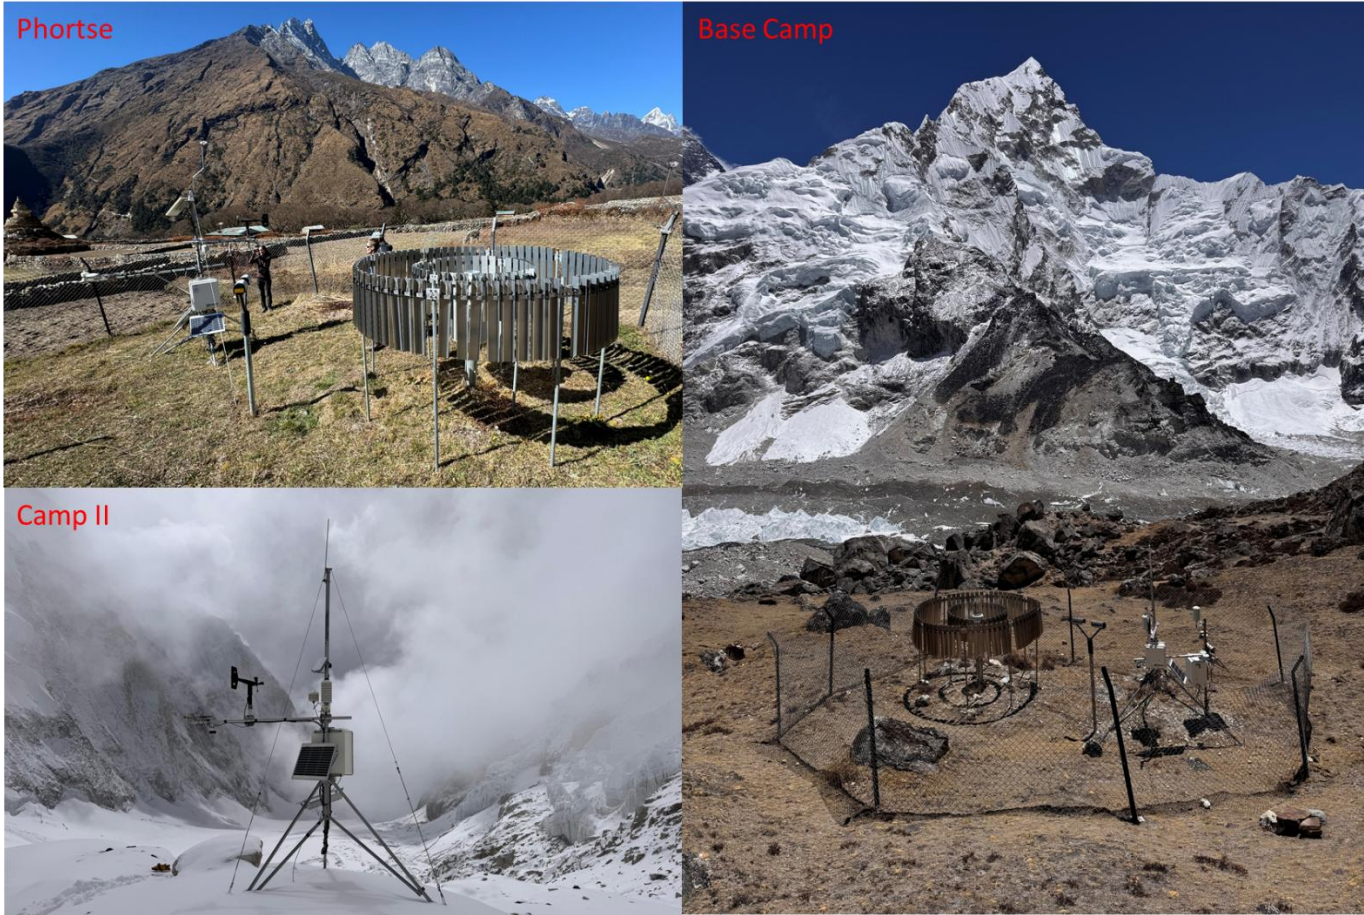

Figure S 1. Photos of Phortse (PH, 3,810 m asl), Base Camp (BC, 5,310 m asl) and Camp II (CII 6,464 m asl) AWSs. (Photo credits: AK)

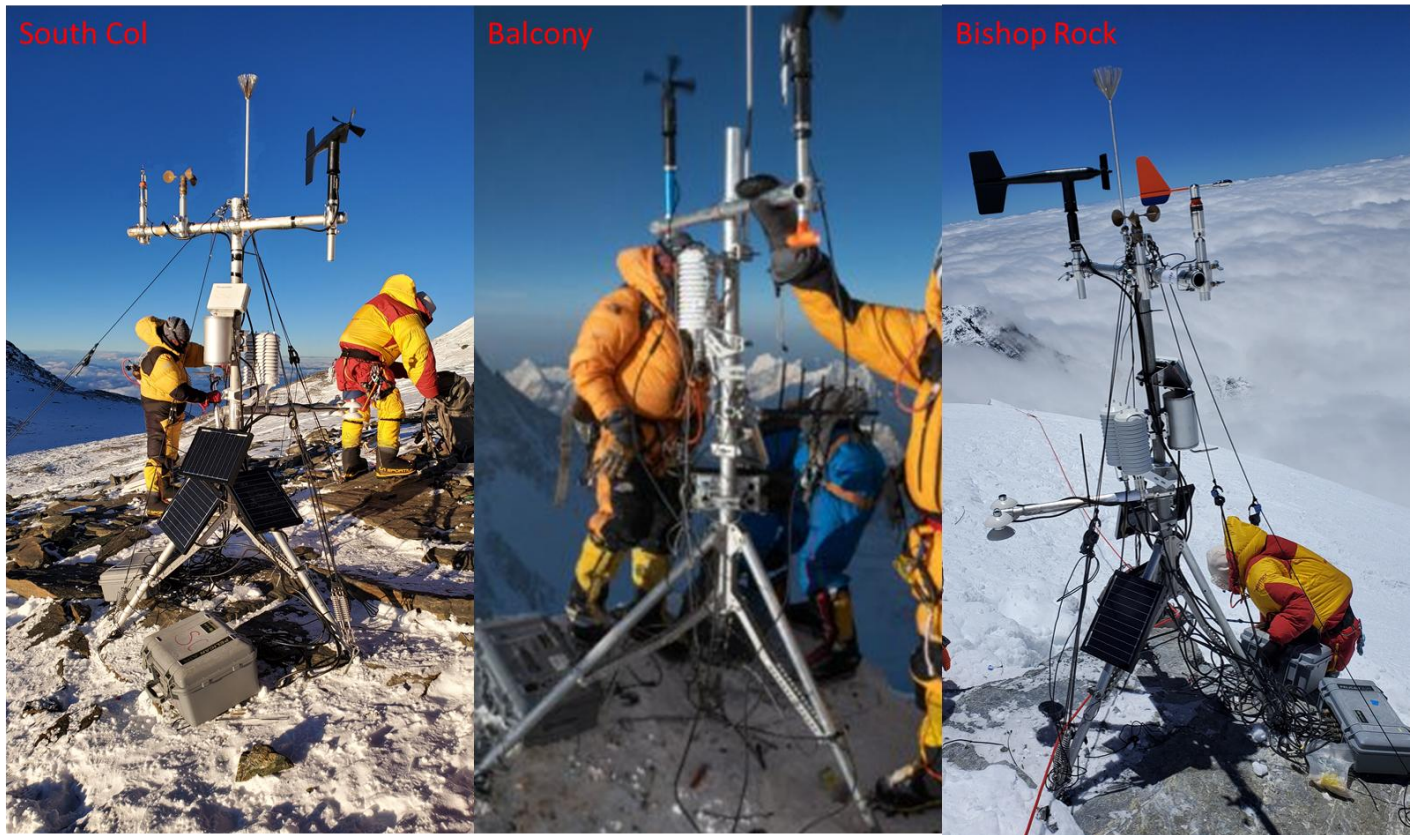

Figure S 2. Photos of South Col (SC, 7,945 m asl), Balcony (BA, 8,430 m asl) and Bishop Rock (BR 8,810 m asl) AWSs. (Phot credits: AK and BP)

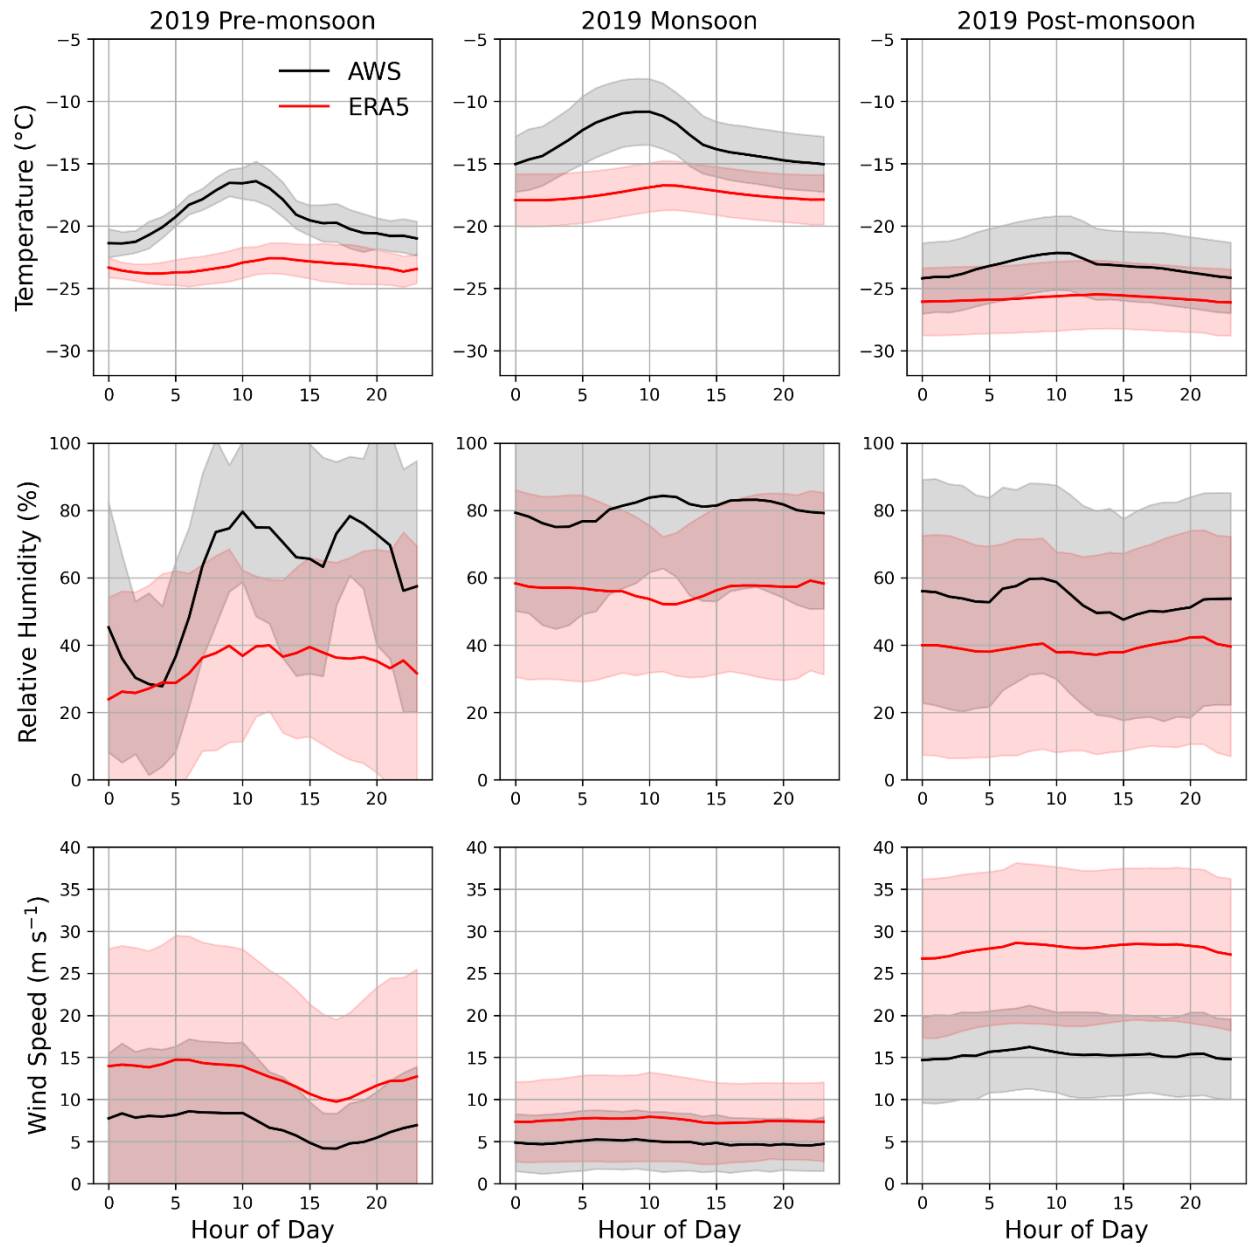

Figure S 3. Mean diurnal cycle of temperature, relative humidity wind speed at SC AWS site for different period of 2019 (in UTC). The shaded light grey and red colour represents the standard deviation respectively

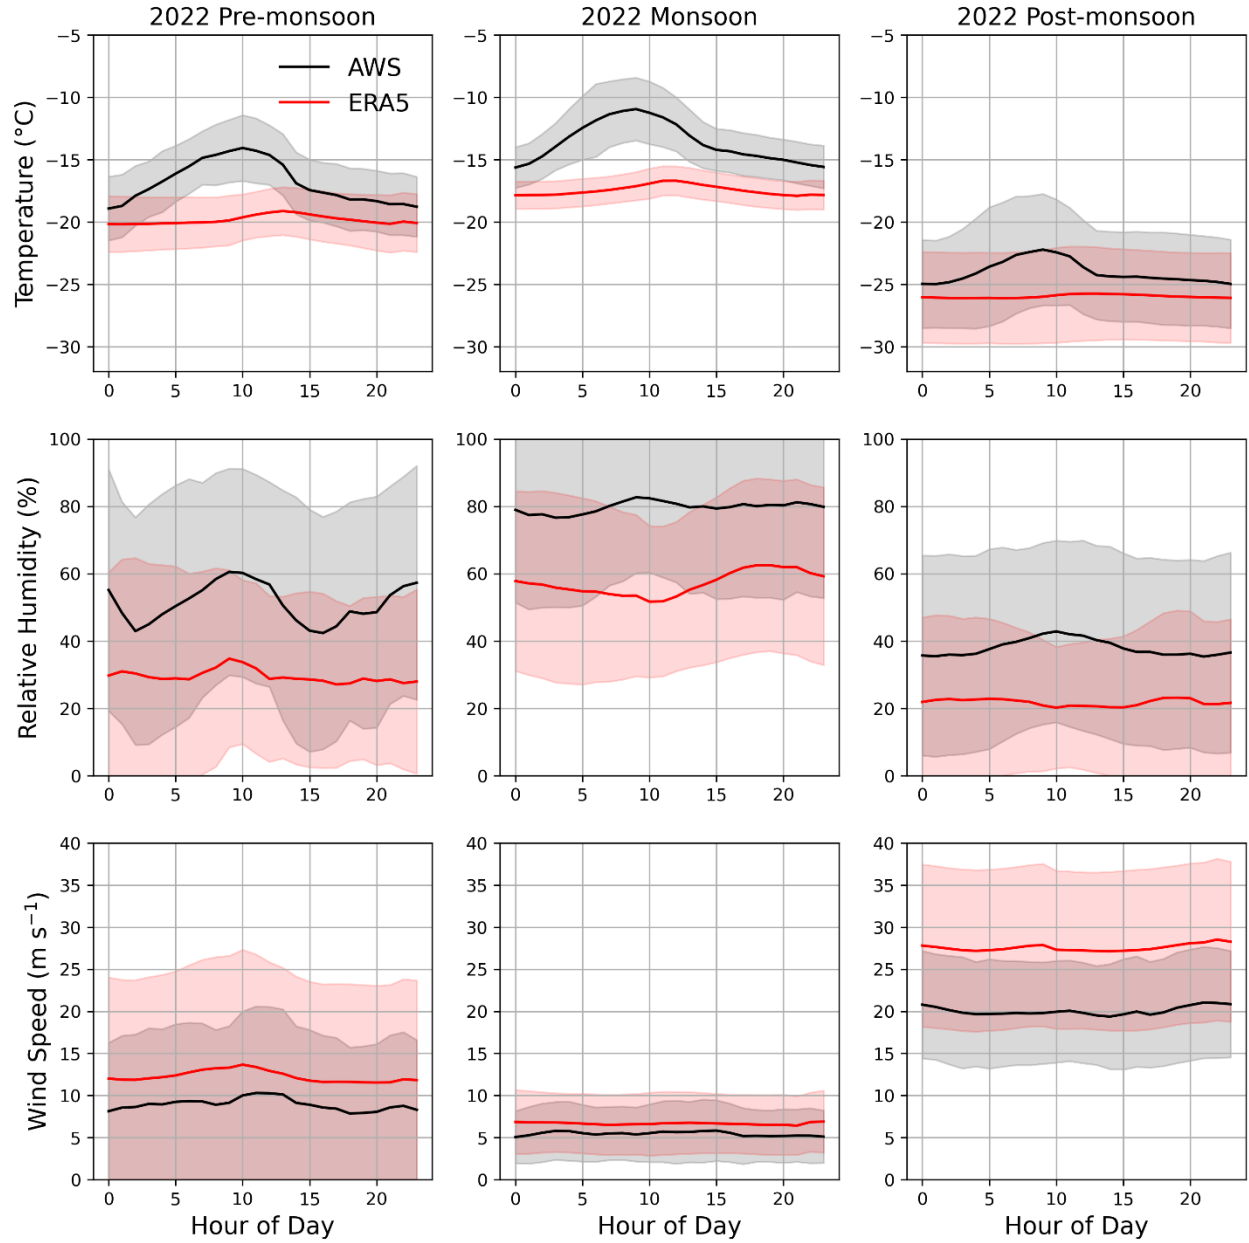

Figure S 4 Mean diurnal cycle of temperature, relative humidity wind speed at SC AWS site for different period of 2022 (in UTC). The shaded light grey and red colour represents the standard deviation respectively.

Table S 1. Sensors type, measured variables and their diagnostic range with the reference link

| Sensor                | Measured variables                 | Diagnostic Range          | Link                                                                                                                                                            |
|-----------------------|------------------------------------|---------------------------|-----------------------------------------------------------------------------------------------------------------------------------------------------------------|
| Vaisala HMP155A-L5-PT | Air temperature; relative humidity | -80 to +60 °C;<br>0–100 % | <a href="https://www.campbellsci.com/hmp155a">https://www.campbellsci.com/hmp155a</a>                                                                           |
| CS109                 | Air temperature                    | -50° to +70°C             | <a href="https://www.campbellsci.com/109">https://www.campbellsci.com/109</a>                                                                                   |
| R.M. Young 05108-45   | Wind speed and direction           | 0 to 100 m/s              | <a href="https://www.youngusa.com/wp-content/uploads/2013/05/05108-45-9028B29.pdf">https://www.youngusa.com/wp-content/uploads/2013/05/05108-45-9028B29.pdf</a> |

|                                    |                             |                                   |                                                                                                         |
|------------------------------------|-----------------------------|-----------------------------------|---------------------------------------------------------------------------------------------------------|
| Richards C5C<br>anemometer         | Wind speed and<br>direction | 0 to 102.8 m/s                    | <a href="http://www.aprsworld.com/sensors/asrichards/">http://www.aprsworld.com/sensors/asrichards/</a> |
| Vaisala PTB 110/<br>Vaisala PTB210 | Barometric<br>pressure      | 500 to 1100 hPa<br>/0 to 2000 hPa | <a href="https://www.vaisala.com/en/products/">https://www.vaisala.com/en/products/</a>                 |
